# Supplementary material for: Efficacy and safety of peficitinib (ASP015K) in patients with rheumatoid arthritis and an inadequate response to conventional DMARDs: a randomised, double-blind, placebo-controlled phase III trial (RAJ3)
Source: PubMed Central journal article supplement — Ann Rheum Dis. 2019 Jul 26;78(10):1320–32. doi: 10.1136/annrheumdis-2019-215163 (PMC6788921; doi:10.1136/annrheumdis-2019-215163), 2019-07-26
Supplement: annrheumdis-2019-215163supp001.pdf [file annrheumdis-2019-215163supp001.pdf]

## 1 SUPPLEMENTARY METHODS

### 2 Randomisation

3 Randomisation was conducted by study region using a biased-coin minimisation procedure  
4 with study centre, inadequate response to previous biological DMARDs, and concomitant  
5 DMARD use at treatment initiation as stratification factors.

### 6 Patient inclusion and exclusion criteria

#### 7 *Inclusion criteria*

8 Patients were eligible for the study if all of the following applied:

- 9 1. Received a full explanation of the study drug and this study in advance, and written  
10 informed consent to participate in the study obtained
- 11 2. A man or woman aged  $\geq 20$  years at the time of informed consent.
- 12 3. Had RA diagnosed according to the 1987 ACR criteria or the 2010 ACR/European  
13 League Against Rheumatism (EULAR) criteria.
- 14 4. Did not receive the following drugs, or received the drugs with stable dosage for at  
15 least 28 days prior to the baseline (start of treatment) for RA treatment: NSAIDs  
16 (excluding topical formulations), oral morphine or equivalent opioid analgesics ( $\leq 30$   
17 mg/day), acetaminophen or oral corticosteroids ( $\leq 10$  mg/day in prednisolone  
18 equivalent).
- 19 5. At screening, had active RA as evidenced by both of the following:
  - 20 •  $\geq 6$  tender/painful joints (using 68-joint assessment)
  - 21 •  $\geq 6$  swollen joints (using 66-joint assessment)
- 22 6. CRP  $> 0.50$  mg/dL at screening.
- 23 7. Met the ACR 1991 Revised Criteria for the Classification of Global Functional Status  
24 in RA Class I, II or III at screening.
- 25 8. Inadequate responder to (including patients who were intolerant of) at least 1  
26 DMARD administered for at least 90 days prior to screening.
- 27 9. When the following DMARDs were concomitantly administered to patient, the drugs  
28 had to be administered for at least 90 days prior to screening, and had to be stable  
29 from at least 28 days prior to screening until the end of the administration period of  
30 study drug or reference drug.
  - 31 • MTX

- 32 • Hydroxychloroquine
  - 33 • Salazosulfapyridine
  - 34 • Gold
  - 35 • D-penicillamine
  - 36 • Lobenzarit
  - 37 • Actarit
  - 38 • Bucillamine
  - 39 • Iguratimod
- 40 10. Willing and able to comply with the study requirements.

41 *Exclusion criteria*

42 Patients were excluded from participation if any of the following applied:

- 43 1. Receipt of a biological DMARD within the specified period:
  - 44 • Anakinra: within 28 days prior to baseline
  - 45 • Adalimumab, infliximab: within 56 days prior to baseline
  - 46 • Golimumab, certolizumab pegol: within 70 days prior to baseline
  - 47 • Abatacept, tocilizumab: within 84 days prior to baseline
  - 48 • Denosumab: within 150 days prior to baseline
  - 49 • Rituximab: within 180 days prior to baseline
  - 50 • Etanercept (regardless of timeframe)
- 51 2. Inadequate responder to at least 3 biological DMARDs as determined by  
52 investigator/subinvestigator.
- 53 3. Receipt of a non-biological DMARD listed below or other drugs used in the treatment  
54 of RA within 28 days prior to baseline. Leflunomide was prohibited within 180 days  
55 prior to baseline. Alternatively, leflunomide was prohibited within 28 days prior to  
56 baseline if washout with cholestyramine for at least 17 days was completed at least  
57 28 days prior to baseline. However, topical drugs other than those for the treatment  
58 of RA could be used concomitantly.
  - 59 • Leflunomide
  - 60 • Tacrolimus
  - 61 • Cyclosporine
  - 62 • Cyclophosphamide
  - 63 • Azathioprine
  - 64 • Minocycline
  - 65 • Mizoribine

- 66 4. Receipt of tofacitinib or other JAK inhibitors (including other investigational drugs),  
67 regardless of timeframe.
- 68 5. Receipt of intra-articular, intravenous, intramuscular or endorectal (excluding  
69 suppositories for anal diseases) corticosteroid within 28 days prior to baseline.
- 70 6. Prior participation in any study of peficitinib and had received peficitinib or placebo.
- 71 7. Receipt of other investigational drugs within 90 days or within 5 half-lives, whichever  
72 was longer, prior to baseline.
- 73 8. Receipt of plasma exchange therapy within 60 days prior to baseline.
- 74 9. Had undergone joint drainage, had received local anaesthesia and nerve block, or  
75 had received articular cartilage protectant at the assessed joint within 28 days prior to  
76 baseline.
- 77 10. Had undergone surgery and had residual effects in the assessed joints at the  
78 discretion of investigator/subinvestigator, or was scheduled to undergo surgery that  
79 could affect the study evaluation of the assessed joints at the discretion of  
80 investigator/subinvestigator.
- 81 11. A diagnosis of inflammatory arthritis (psoriatic arthritis, ankylosing spondylitis,  
82 systemic lupus erythematosus, sarcoidosis, etc.) other than RA.
- 83 12. Any of the following laboratory values during the screening test period:
- 84 • Haemoglobin <9.0 g/dL
- 85 • Absolute neutrophil count <1000/ $\mu$ L
- 86 • Absolute lymphocyte count <800/ $\mu$ L
- 87 • Platelet count <75000/ $\mu$ L
- 88 • Alanine aminotransferase (ALT)  $\geq 2 \times$  upper limit of normal (ULN)
- 89 • Aspartate aminotransferase (AST)  $\geq 2 \times$  ULN
- 90 • Total bilirubin  $\geq 1.5 \times$  ULN
- 91 • Estimated glomerular filtration rate (eGFR)  $\leq 40$  mL/min as measured by the  
92 modification of diet in renal disease method
- 93 •  $\beta$ -D-glucan >ULN [in case of Japan:  $\geq 11$  pg/mL]
- 94 • Positive hepatitis B surface (HBs) antigen, hepatitis B core (HBc) antibody,  
95 HBs antibody or HBV-DNA quantitation (However, patient with negative HBs  
96 antigen and HBV-DNA quantitation, and positive HBc antibody and/or HBs  
97 antibody was eligible if HBV-DNA was monitored by HBV-DNA quantitation at  
98 every scheduled visit after initiation of study drug or reference drug  
99 administration)
- 100 • Positive hepatitis C virus antibody

- 101 13. A history of or concurrent active tuberculosis. Eligibility criteria for tuberculosis are  
102 tabulated at the end of this section.
- 103 14. Any of the following in terms of infections except for tuberculosis:
- 104 • History of or concurrent severe herpes zoster (associated with Hunt  
105 syndrome or having ulcerative lesions) or disseminated herpes zoster
  - 106 • History of multiple recurrences (at least twice) of localised herpes zoster
  - 107 • Serious infection requiring hospitalisation within 90 days prior to baseline
  - 108 • Had received intravenous antibiotics within 90 days prior to baseline.  
109 (However, prophylactic antibiotics were allowed)
  - 110 • With high risk of infection (e.g., patient with urinary catheter) at the discretion  
111 of investigator
- 112 15. A history of or concurrent interstitial pneumonia and investigator judged that it was  
113 inappropriate for the patient to participate in this study.
- 114 16. A history of or concurrent malignant tumour (except for successfully treated basal cell  
115 carcinoma).
- 116 17. Receipt of live or live attenuated virus vaccination within 56 days prior to baseline.  
117 (Inactivated vaccines including influenza and pneumococcal vaccines were allowed).
- 118 18. A history of or concurrent demyelinating disorders.
- 119 19. Any ongoing severe, progressive or uncontrolled renal, hepatic, haematological,  
120 gastrointestinal, metabolic, endocrine, pulmonary, cardiac, neurological, infectious or  
121 autoimmune disease except for RA (excluding Sjogren's syndrome and chronic  
122 thyroiditis), or any ongoing illness which would make the patient unsuitable for the  
123 study as determined by the investigator.
- 124 20. A history of clinically significant allergy (including allergies such as systemic urticaria  
125 induced by specific antigens and drugs, anaphylaxis, and allergy associated with  
126 shock necessitating hospitalised treatment).
- 127 21. Had received medications that were cytochrome P450 3A substrates with narrow  
128 therapeutic range within 14 days prior to baseline, including dihydroergotamine,  
129 ergotamine, fentanyl, pimozide, quinidine, temsirolimus and disopyramide.
- 130 22. A history of or concurrent cardiac failure, defined as New York Heart Association  
131 classification Class III or higher.
- 132 23. A history of or concurrent prolonged QT syndrome, defined as QTc  $\geq$ 500 ms, at  
133 screening
- 134 24. A history of positive human immunodeficiency virus infection.
- 135 25. Was a woman who was pregnant or might be pregnant, was nursing, wished to  
136 conceive for a period running from the time informed consent was given within 60

- 137 days after the EOT (including reference drug), or for whom the possibility of  
 138 pregnancy could not be ruled out as a result of the serum pregnancy test given at the  
 139 time of screening.
- 140 26. Was a man who could not practice at least 2 types of contraception from the time of  
 141 informed consent to 90 days after the EOT (including reference drug), or patient was  
 142 a woman with childbearing potential who could not practice at least 2 types of  
 143 contraception from the time of informed consent to 60 days after the EOT (including  
 144 reference drug).
- 145 27. Male patient who did not agree not to donate sperm starting at informed consent and  
 146 through the treatment period and for at least 90 days after final study drug (or  
 147 reference drug) administration. Female patient who did not agree not to donate ova  
 148 starting at informed consent through the treatment period and for 60 days after final  
 149 study drug (or reference drug) administration.
- 150 28. Judged unsuitable to participate in the study for other reasons by the investigator.
- 151 29. A history or complication of lymphatic diseases such as lymphoproliferative disorder,  
 152 lymphoma and leukaemia.
- 153 30. A history of or current congenital short QT syndrome, defined by QTc <330 msec.

154 **Tuberculosis history and eligibility for enrolment**

| History of active tuberculosis | Chest X-ray for tuberculosis | Tuberculosis infection <sup>b</sup> | Exposure to patients with infective tuberculosis (interview) | Eligibility                                    |
|--------------------------------|------------------------------|-------------------------------------|--------------------------------------------------------------|------------------------------------------------|
| Present                        | -                            | -                                   | -                                                            | Not eligible                                   |
| Absent                         | Abnormal (active)            | -                                   | -                                                            | Not eligible                                   |
|                                | Abnormal (old) <sup>a</sup>  | -                                   | Either exposed or not exposed                                | Eligible if prophylaxis was given <sup>c</sup> |
|                                | Normal                       | Positive                            | Either exposed or not exposed                                | Eligible if prophylaxis was given <sup>c</sup> |
|                                |                              | Negative                            | Exposed                                                      | Eligible if prophylaxis was given <sup>c</sup> |
|                                |                              | Negative                            | Not exposed                                                  | Eligible                                       |

155 <sup>a</sup>Old tuberculosis was evidenced if chest X-ray reveals pleural thickening, band-like shadow and calcification  
 156  $\geq 5$  mm. A chest X-ray within 90 days prior to baseline could substitute for the screening test.

157 <sup>b</sup>T-spot or Quantiferon Gold test was first priority. When the result was equivocal or invalid, a retest including  
 158 other test methods was allowed. If a retest was not performed, the criteria for positive results were followed.  
 159 When T-spot or Quantiferon Gold test was not feasible, tuberculin test was performed. Tuberculin was defined as

160 positive with a red spot covering an area of  $\geq 20$  mm (10 mm for Korea, 5 mm for Taiwan), or induration. Tests  
161 conducted within 90 days prior to baseline could be used for diagnosis.

162 <sup>c</sup>For Japan and Korea, patient had to receive or have received prophylaxis with isoniazid or rifampicin for 6 to 9  
163 months, starting from at least 21 days prior to baseline. For Taiwan, patient had to receive or have received  
164 prophylaxis with isoniazid for 9 months, starting from at least 21 days prior to baseline.

## 165 **Prior medication**

166 Prior medication recorded included DMARDs and prohibited concomitant medications taken  
167  $\leq 90$  days prior to baseline, and restricted concomitant medications and rescue medications  
168 taken  $\leq 28$  days prior to baseline. The following biological DMARDs were prohibited within  
169 the stated periods before baseline: etanercept (regardless of timeframe); anakinra ( $\leq 28$   
170 days); adalimumab and infliximab ( $\leq 56$  days); golimumab and certolizumab pegol ( $\leq 70$   
171 days); abatacept and tocilizumab ( $\leq 84$  days); denosumab ( $\leq 150$  days); or rituximab ( $\leq 180$   
172 days).

173 Non-biological DMARDs were prohibited within 28 days of baseline, with the exception of:  
174 MTX (with concomitant folic acid whenever possible); hydroxychloroquine;  
175 salazosulfapyridine; gold; D-penicillamine; lobenzarit; actarit; bucillamine; and iguratimod.  
176 Medications used to treat RA (including biological and non-biological DMARDs, tacrolimus,  
177 cyclosporine, cyclophosphamide, azathioprine, and minocycline) were also prohibited  $\leq 28$   
178 days before baseline, with the exception of topical drugs.

179 Patients were not permitted to have received treatment with the following drugs, unless  
180 received on a stable dosage for  $\geq 28$  days prior to baseline and within the following specified  
181 doses: NSAIDs (excluding topical formulations), oral morphine or equivalent opioid  
182 analgesics ( $\leq 30$  mg/day), acetaminophen or oral corticosteroids ( $\leq 10$  mg/day in prednisolone  
183 equivalent).

184 Receipt of the following drugs and therapies was also prohibited: oral corticosteroids at  
185 doses  $> 10$  mg/day prednisolone equivalent and corticosteroids administered via other routes  
186 (excepting topical corticosteroid)  $\leq 28$  days prior to baseline; tofacitinib or another JAK  
187 inhibitor regardless of timeframe; leflunomide  $\leq 180$  days prior to baseline, or  $\leq 28$  days prior  
188 to baseline if washout with cholestyramine for  $\geq 17$  days was completed  $\geq 28$  days prior to  
189 baseline; other study drugs within 90 days or 5 half-lives, whichever was longer, prior to  
190 baseline; CYP3A substrates with a narrow therapeutic range, such as dihydroergotamine,  
191 ergotamine, fentanyl, pimizide, quinidine, temsirolimus, disopyramide  $\leq 14$  days prior to  
192 baseline; live or live attenuated virus vaccinations  $\leq 56$  days prior to baseline; and other  
193 surgical treatments that could affect the evaluation of peficitinib.

194 The following rescue medications could be used  $\leq 28$  days prior to baseline, and within the  
195 following specified time periods, but not within 24 h of baseline joint assessment and only for  
196 the treatment of an AE: NSAIDs: for  $\leq 3$  days, and analgesics other than NSAIDs for  $\leq 7$   
197 consecutive days.

### 198 **Concomitant medication**

199 With the exception of etanercept given as the reference drug, the following biological  
200 DMARDs were prohibited during study treatment: adalimumab, anakinra, infliximab,  
201 golimumab, certolizumab pegol, abatacept, tocilizumab, rituximab, etanercept and  
202 denosumab. Patients receiving allowed non-biological DMARDs (see above) were required  
203 to maintain the same dosage and administration schedule from  $\geq 28$  days before screening  
204 until the end of the study. The only other permitted concomitant therapies were rescue  
205 medications, such as NSAIDs, oral morphine ( $\leq 30$  mg/day or equivalent of other opioid  
206 analgesics), acetaminophen, oral corticosteroids (prednisolone or equivalent,  $\leq 10$  mg/day),  
207 and topical drugs other than those used to treat RA. Following a protocol amendment in April  
208 2015, MTX was included in the permitted concomitant DMARDs.

### 209 **Sample size determination**

210 From the results of RAJ1 and studies of other RA drugs, it was calculated that 62 patients  
211 per treatment arm would provide 90% power to detect a significant difference with a two-  
212 sided significance level of 0.05, assuming ACR20 response rates at Week 12 of 25%, 54.5%  
213 and 65.5% in the placebo, peficitinib 100 mg, and peficitinib 150 mg groups, respectively.  
214 Additionally, ICH guidelines [18] and the Japan Ministry of Health Labour and Welfare  
215 guidelines on methodology for clinical assessment of antirheumatic drugs [19] states that  
216 100 patients per treatment arm is required to observe delayed AEs at a frequency of 0.5–5%  
217 and to determine if there is an increase in high-frequency AEs during later treatment stages.  
218 The sample size of the etanercept reference group was set as 200 in order to give 95%  
219 probability of detecting at least one patient with an AE occurring at an incidence rate of 1.5%

### 220 **Statistical analyses**

221 For the primary analysis of ACR20 response at Week 12/ET, pairwise comparisons to  
222 placebo were performed at each peficitinib dose level by using a logistic regression model  
223 with treatment group (placebo, peficitinib 100 mg and peficitinib 150 mg) as the factor and  
224 prior biological DMARD-IR, concomitant DMARD use at baseline, and study region (Japan,

225 Korea and Taiwan) as the covariates. Multiplicity adjustment in the primary analysis was  
226 carried out using the following closed testing procedure:

227 Step 1. ACR20 response at Week 12/ET: peficitinib 150 mg vs placebo

228 Step 2. ACR20 response at Week 12/ET: peficitinib 100 mg vs placebo

229

230 To assess the robustness of findings from the primary efficacy analyses, the following  
231 sensitivity analyses were performed for the ACR20 response at Week 12/ET: using the last  
232 observation carried forward (LOCF) method for components and non-responder imputation  
233 for response; using the LOCF method for components and the per protocol set (all patients  
234 in the FAS who received study or reference treatment for at least 8 weeks with a treatment  
235 compliance of  $\geq 75\%$  and had no major protocol violations) as the analysis set; using data as  
236 collected with no imputation or multiplicity adjustment; using multiple imputation assuming  
237 missing randomisation mechanism; using placebo multiple imputation; and a re-  
238 randomisation test.

239

240 The other analyses for primary and secondary endpoints, which include continuous  
241 variables, raw value and change from baseline at each visit (baseline, Weeks 4, 8, 12,  
242 12/ET), were conducted using the analysis of covariance model with treatment group  
243 (placebo, peficitinib 100 mg and 150 mg) as the factor and the prior biological DMARD-IR,  
244 concomitant DMARD at baseline use, study region (Japan, Korea and Taiwan), and baseline  
245 value as the covariates.

246

247 Categorical variables at each visit were also analysed using the logistic regression model, as  
248 described for the primary efficacy variable, unless otherwise specified in the statistical  
249 analysis plan.

250

251 For missing data, the last observation carried forward (LOCF) method was used for efficacy  
252 and laboratory variables at Week 12/ET and Week 52/ET. All outliers were included in the  
253 analysis.

## 254 **SUPPLEMENTARY RESULTS**

### 255 **Incidence of malignancies**

256 A total of four patients experienced malignancies: three treated with peficitinib (including one  
257 patient who switched from placebo) and one treated with etanercept.



- 258 • A 65-year-old female receiving peficitinib 100 mg developed a gastric  
259 adenocarcinoma at Day 147 (Week 21). Her medical history included iron deficiency  
260 anaemia and left ventricular hypertrophy. Concomitant medications included  
261 DMARDs (oral hydroxychloroquine, 400 mg/day; oral MTX, 15 mg/week; oral  
262 sulphasalazine, 1000 mg/day), isoniazid, pyridoxine HCl, tramadol and  
263 acetaminophen, prednisolone, Celebrex and folic acid. On Day 100 (Week 14), the  
264 patient presented with epigastralgia, poor appetite and occasional nausea. Peficitinib  
265 treatment was suspended on Day 119 (Week 17), and a gastric ulcer was revealed  
266 by upper gastrointestinal panendoscopy. The patient was discharged on Day 120  
267 and peficitinib treatment resumed on Day 128. On Day 147 (Week 21),  
268 adenocarcinoma was diagnosed by pathological biopsy and peficitinib treatment  
269 permanently discontinued on Day 152 (Week 21). Endoscopic mucosal resection  
270 was conducted on Day 183 (Week 26) and the adenocarcinoma and gastric ulcer  
271 were considered to be resolving at Day 281 (Week 40). Other adverse events  
272 experienced by the patient during the study included renal function impairment,  
273 alanine aminotransaminase elevation and cough. The investigator judged the gastric  
274 ulcer and adenocarcinoma to be possibly related to peficitinib.
- 275 • An 86-year-old male receiving peficitinib 100 mg developed advanced colon cancer  
276 at Day 140 (Week 20). The patient had a medical history of hypertension, type 2  
277 diabetes mellitus, dyslipidemia, prior cerebral infarction and eczema. The patient  
278 concomitantly received DMARDs (oral salazosulfapyridine, 1000 mg/day; oral MTX, 6  
279 mg/week), enalapril maleate, glimepiride, linagliptin, clopidogrel sulfate, pitavastatin  
280 calcium, amlodipine besilate, famotidine, metformin hydrochloride, folic acid and  
281 loxoprofen sodium. A decrease in haemoglobin (99 g/L; normal range 135–175 g/L)  
282 was noted on Day 83 (Week 11) and advanced colon cancer diagnosed on Day 140  
283 (Week 20). Peficitinib was discontinued on Day 142 (Week 20) and MTX reduced to  
284 5 mg/week due to concerns of folate deficiency anaemia. Following laparoscopic  
285 rectal resection on Day 182 (Week 26), the patient experienced post-operative  
286 anastomotic leakage and peritonitis, which began to resolve on Day 210 (Week 30).  
287 The patient was discharged from hospital on Day 223 (Week 31). The investigator  
288 considered the colon cancer likely to have been present prior to the study and its  
289 development unrelated to peficitinib treatment.
- 290 • A 55-year-old female who switched from placebo to peficitinib 100 mg at Day 86  
291 (Week 12) developed breast cancer at Day 216 (Week 30). The patient had a  
292 medical history of spondylosis deformans, erosive gastritis, atypical psychosis,  
293 hypertension, sinusitis, herpes zoster (Mar-2015) and osteoporosis. Concomitant

294 medications included oral MTX (16 mg/week), celecoxib, prednisolone, isoniazid,  
295 folic acid, carbocisteine, lansoprazole, loxoprofen sodium, alfacalcidol, magnesium  
296 oxide, zolpidem tartrate, valsartan, risperidone, trihexyphenidyl hydrochloride,  
297 zotepine and clarithromycin. Following diagnosis with left breast cancer on Day 216  
298 (Week 30), peficitinib was immediately discontinued. Left mastectomy was performed  
299 on Day 258 (Week 37) and chemotherapy begun on Day 292 (Week 41). The breast  
300 cancer was judged to be resolving on Day 467 (Week 66). The event was considered  
301 by the investigator to be possibly related to peficitinib.

- 302 • A 46-year-old female receiving etanercept developed thyroid cancer during follow up.  
303 The patient had a medical history of pericarditis, dilated cardiomyopathy, chronic  
304 cystitis, fatty liver disease and anaemia. Concomitant medications included DMARDs  
305 (oral bucillamine, 200 mg/day; oral MTX, 12 mg/week), prednisolone, folic acid,  
306 celecoxib, diclofenac sodium, rabeprazole sodium, alendronate, Baktar,  
307 spironolactone and bisoprolol fumarate. Other adverse events experienced by the  
308 patient during the study included bradycardia, common cold, chest pain and cough.  
309 Treatment with MTX was discontinued on Day 297 (Week 42) following development  
310 of the persistent cough. The patient completed the course of etanercept on Day 358  
311 (Week 51). Anaplastic thyroid cancer was diagnosed on Day 381 (Week 54) and  
312 treatment with bucillamine discontinued on Day 394 (Week 56). The patient  
313 developed multiple metastases and died on Day 547 following a thoracic aorta  
314 rupture due to cancer invasion. The investigator considered the development of  
315 thyroid cancer possibly related to etanercept.

## SUPPLEMENTARY TABLES

Supplementary Table 1. Sensitivity analysis of ACR20 response

|                                                                                       | Number of responders, n (%) | Treatment difference versus placebo |                         |                         |                      |
|---------------------------------------------------------------------------------------|-----------------------------|-------------------------------------|-------------------------|-------------------------|----------------------|
|                                                                                       |                             | Difference (%) <sup>*</sup>         | Odds ratio <sup>†</sup> | 95% CI (%) <sup>‡</sup> | P value <sup>§</sup> |
| <b>ACR20 response at Week 12/ET (LOCF and non-responder imputation) (FAS)</b>         |                             |                                     |                         |                         |                      |
| Placebo (N=101)                                                                       | 29 (28.7)                   |                                     |                         |                         |                      |
| Peficitinib 100 mg (N=104)                                                            | 57 (54.8)                   | 26.1                                | 3.08                    | (1.72, 5.54)            | <0.001               |
| Peficitinib 150 mg (N=102)                                                            | 71 (69.6)                   | 40.9                                | 5.68                    | (3.10, 10.39)           | <0.001               |
| Etanercept (open-label arm) (N=200)                                                   | 163 (81.5)                  | 52.8                                | -                       | -                       | -                    |
| <b>ACR20 response at Week 12/ET (LOCF) (re-randomisation test<sup>  </sup>) (FAS)</b> |                             |                                     |                         |                         |                      |
| Peficitinib 150 mg versus placebo                                                     |                             |                                     |                         |                         | <0.001               |
| Peficitinib 100 mg versus placebo                                                     |                             |                                     |                         |                         | <0.001               |
| <b>ACR20 response at Week 12 (observed data) (FAS)</b>                                |                             |                                     |                         |                         |                      |
| Placebo (N=88)                                                                        | 29 (33.0)                   |                                     |                         |                         |                      |
| Peficitinib 100 mg (N=96)                                                             | 57 (59.4)                   | 26.4                                | 2.98                    | (1.62, 5.46)            | <0.001               |
| Peficitinib 150 mg (N=92)                                                             | 71 (77.2)                   | 44.2                                | 6.97                    | (3.59, 13.54)           | <0.001               |
| Etanercept (open-label arm) (N=191)                                                   | 162 (84.8)                  | 51.8                                | -                       | -                       | -                    |
| <b>ACR20 response at Week 12/ET (LOCF) (PPS)</b>                                      |                             |                                     |                         |                         |                      |
| Placebo (N=91)                                                                        | 30 (33.0)                   |                                     |                         |                         |                      |
| Peficitinib 100 mg (N=92)                                                             | 55 (59.8)                   | 26.8                                | 3.05                    | (1.66, 5.60)            | <0.001               |
| Peficitinib 150 mg (N=95)                                                             | 72 (75.8)                   | 42.8                                | 6.42                    | (3.37, 12.22)           | <0.001               |
| Etanercept (open-label arm) (N=188)                                                   | 160 (85.1)                  | 52.1                                | -                       | -                       | -                    |

| <b>ACR20 response at Week 12 (multiple imputation assuming missing at random) (FAS)</b> |       |      |      |               |        |
|-----------------------------------------------------------------------------------------|-------|------|------|---------------|--------|
| Placebo (N=101)                                                                         | 32.1% |      |      |               |        |
| Peficitinib 100 mg (N=103)                                                              | 58.7% | 26.7 | 3.07 | (1.70, 5.57)  | <0.001 |
| Peficitinib 150 mg (N=102)                                                              | 75.8% | 43.7 | 6.72 | (3.52, 12.82) | <0.001 |
| Etanercept (open-label arm) (N=200)                                                     | 83.5% | 51.4 | -    | -             | -      |
| <b>ACR20 response at Week 12 (placebo multiple imputation) (FAS)</b>                    |       |      |      |               |        |
| Placebo (N=101)                                                                         | 31.2% |      |      |               |        |
| Peficitinib 100 mg (N=103)                                                              | 56.4% | 25.2 | 2.91 | (1.61, 5.25)  | <0.001 |
| Peficitinib 150 mg (N=102)                                                              | 72.4% | 41.2 | 5.80 | (3.09, 10.87) | <0.001 |
| Etanercept (open-label arm) (N=200)                                                     | 82.3% | 51.1 | -    | -             | -      |

CI, confidence interval; LOCF, last observation carried forward; N, total number of responders and non-responders (percentages based on N); PPS, per protocol set. Patients with all baseline ACR components data missing were not included in percentages because ACR20 response cannot be calculated.

\*Difference in proportion of responders (each group minus placebo)

†Based on logistic regression model: ACR20 response (responder, non-responder) = treatment + inadequate response to prior biological DMARD use (No, Yes) + concomitant DMARD use (No, Yes) + study region (Japan, Korea, and Taiwan). Odds ratio >1 favours peficitinib

‡CI was based on normal approximation to the binomial distribution

§Wald's chi-squared test with no multiplicity adjustment. Etanercept was an open-label reference group and was not included in statistical comparisons with placebo

¶Re-randomisation test using the two-sided Monte Carlo p value. Based on logistic regression model: ACR20 response (responder, non-responder) = treatment + inadequate response to prior biological DMARD use (No, Yes) + concomitant DMARD use (No, Yes) + study region (Japan, Korea, or Taiwan)

**Supplementary Table 2.** Subgroup analysis of ACR20-CRP response at Week 12/ET (FAS)

|                                   | Placebo      | Peficitinib 100 mg |                            | Peficitinib 150 mg |                            | Etanercept     |
|-----------------------------------|--------------|--------------------|----------------------------|--------------------|----------------------------|----------------|
|                                   | n/N (%)      | n/N (%)            | OR versus placebo (95% CI) | n/N (%)            | OR versus placebo (95% CI) |                |
| Number of prior biological DMARDs |              |                    |                            |                    |                            |                |
| 0                                 | 28/90 (31.1) | 52/90 (57.8)       | 3.10 (1.67, 5.74)*         | 65/89 (73.0)       | 6.03 (3.15, 11.55)*        | 137/162 (84.6) |
| 1                                 | 2/7 (28.6)   | 6/8 (75.0)         | N/E                        | 9/9 (100.0)        | N/E                        | 25/28 (89.3)   |
| 2                                 | 1/4 (25.0)   | 1/4 (25.0)         | N/E                        | 2/4 (50.0)         | N/E                        | 4/9 (44.4)     |
| ≥3                                | --           | 1/2 (50.0)         | N/E                        | --                 | --                         | 1/1 (100.0)    |
| Prior biological DMARD-IR         |              |                    |                            |                    |                            |                |
| Yes                               | 2/5 (40.0)   | 4/9 (44.4)         | N/E                        | 5/7 (71.4)         | N/E                        | 12/15 (80.0)   |
| No                                | 29/96 (30.2) | 56/95 (58.9)       | 3.35 (1.84, 6.10)†         | 71/95 (74.7)       | 6.90 (3.64, 13.05)†        | 155/185 (83.8) |
| Concomitant DMARD use             |              |                    |                            |                    |                            |                |
| Yes                               | 27/87 (31.0) | 51/91 (56.0)       | 2.84 (1.54, 5.27)‡         | 67/89 (75.3)       | 6.92 (3.55, 13.51)‡        | 149/176 (84.7) |
| MTX                               | 19/57 (33.3) | 39/63 (61.9)       | 3.24 (1.52, 6.91)*         | 50/62 (80.6)       | 8.75 (3.74, 20.48)*        | 92/117 (78.6)  |
| DMARDs other than MTX only        | 8/30 (26.7)  | 12/28 (42.9)       | N/E                        | 17/27 (63.0)       | N/E                        | 57/59 (96.6)   |
| No                                | 4/14 (28.6)  | 9/13 (69.2)        | N/E                        | 9/13 (69.2)        | N/E                        | 18/24 (75.0)   |

|                                | Placebo      | Peficitinib 100 mg |                            | Peficitinib 150 mg |                            | Etanercept   |
|--------------------------------|--------------|--------------------|----------------------------|--------------------|----------------------------|--------------|
|                                | n/N (%)      | n/N (%)            | OR versus placebo (95% CI) | n/N (%)            | OR versus placebo (95% CI) |              |
| MTX dose (mg/week) at baseline |              |                    |                            |                    |                            |              |
| None                           | 12/44 (27.3) | 21/41 (51.2)       | N/E                        | 26/40 (65.0)       | N/E                        | 75/83 (90.4) |
| 0–≤8                           | 5/23 (21.7)  | 9/13 (69.2)        | N/E                        | 12/16 (75.0)       | N/E                        | 30/41 (73.2) |
| 8–≤12                          | 4/13 (30.8)  | 20/30 (66.7)       | N/E                        | 24/30 (80.0)       | N/E                        | 24/31 (77.4) |
| >12                            | 10/21 (47.6) | 10/20 (50.0)       | 1.14 (0.33, 4.00)*         | 14/16 (87.5)       | N/E                        | 38/45 (84.4) |

CI, confidence interval; DMARD, disease-modifying anti-rheumatic drug; IR, inadequate response; N, total number of responders and non-responders (percentages based on N); OR, odds ratio (calculated versus placebo). In the case of early termination, ACR components were analysed using the last observation carried forward method (LOCF) first, and then ACR20 response was calculated. CIs were based on a normal approximation to a binomial distribution

\*Based on logistic regression model: ACR20 response (responder, non-responder) = treatment + inadequate response to prior biological DMARD use (No, Yes) + concomitant DMARD use (No, Yes) + study region (Japan, Korea, and Taiwan). Odds ratio >1 favours peficitinib

†Based on logistic regression model: ACR20 response (responder, non-responder) = treatment + concomitant DMARD use (No, Yes) + study region (Japan, Korea, and Taiwan). Odds ratio >1 favours peficitinib

‡Based on logistic regression model: ACR20 response (responder, non-responder) = treatment + inadequate response to prior biological DMARD use (No, Yes) + study region (Japan, Korea, and Taiwan). Odds ratio >1 favours peficitinib

**Supplementary Table 3.** ACR20, ACR50 and ACR70 response rates and HAQ-DI scores at Weeks 0, 4, 8, 12 and 52

|                   |         | Week 0      | Week 4        | Week 8       | Week 12      | Week 52      |
|-------------------|---------|-------------|---------------|--------------|--------------|--------------|
| ACR20, % (n/N)    | Placebo | -           | 20.0 (19/95)  | 31.1 (28/90) | 33.0 (29/88) | --           |
|                   | 100mg   | -           | 43.9 (43/98)  | 51.0 (49/96) | 59.4 (57/96) | 73.2 (52/71) |
|                   | 150mg   | -           | 45.0 (45/100) | 68.7 (68/99) | 77.2 (71/92) | 90.1 (73/81) |
| ACR50, % (n/N)    | Placebo | -           | 3.2 (3/95)    | 5.6 (5/90)   | 10.2 (9/88)  | --           |
|                   | 100mg   | -           | 8.2 (8/98)    | 25.0 (24/96) | 32.3 (31/96) | 49.3 (35/71) |
|                   | 150mg   | -           | 14.0 (14/100) | 35.4 (35/99) | 45.7 (42/92) | 75.3 (61/81) |
| ACR70, % (n/N)    | Placebo | -           | 0.0 (0/95)    | 1.1 (1/90)   | 1.1 (1/88)   | --           |
|                   | 100mg   | -           | 1.0 (1/98)    | 11.5 (11/96) | 14.6 (14/96) | 35.2 (25/71) |
|                   | 150mg   | -           | 2.0 (2/100)   | 14.1 (14/99) | 29.3 (27/92) | 48.1 (39/81) |
| HAQ-DI, mean (SD) | Placebo | 1.00 (0.66) | 0.98 (0.65)   | 0.95 (0.65)  | 0.94 (0.63)  | --           |

---

|       |             |             |             |             |             |
|-------|-------------|-------------|-------------|-------------|-------------|
| 100mg | 0.92 (0.69) | 0.81 (0.62) | 0.66 (0.57) | 0.62 (0.59) | 0.52 (0.59) |
| 150mg | 1.03 (0.67) | 0.83 (0.59) | 0.70 (0.54) | 0.61 (0.53) | 0.45 (0.45) |

---

All values are observed data



**Supplementary Table 4.** Overview of treatment-emergent adverse events from Week 12 to Week 52 or later

| n (%)                                                                            | <b>Peficitinib<br/>100 mg<br/>(N=96)</b> | <b>Peficitinib<br/>150 mg<br/>(N=93)</b> | <b>Placebo to<br/>100 mg at<br/>Week 12<br/>(N=43)</b> | <b>Placebo to<br/>150 mg at<br/>Week 12<br/>(N=47)</b> | <b>Peficitinib 100<br/>mg + 150 mg<br/>(N=189)</b> | <b>Etanercept<br/>(open-label<br/>arm) (N=191)</b> | <b>Total except<br/>for<br/>etanercept<br/>(N=279)</b> |
|----------------------------------------------------------------------------------|------------------------------------------|------------------------------------------|--------------------------------------------------------|--------------------------------------------------------|----------------------------------------------------|----------------------------------------------------|--------------------------------------------------------|
| Drug-related TEAEs*                                                              | 50 (52.1)                                | 47 (50.5)                                | 27 (62.8)                                              | 26 (55.3)                                              | 97 (51.3)                                          | 93 (48.7)                                          | 150 (53.8)                                             |
| SAE                                                                              | 5 (5.2)                                  | 6 (6.5)                                  | 4 (9.3)                                                | 5 (10.6)                                               | 11 (5.8)                                           | 14 (7.3)                                           | 20 (7.2)                                               |
| Deaths                                                                           | 0                                        | 0                                        | 0                                                      | 0                                                      | 0                                                  | 0                                                  | 0                                                      |
| Drug-related SAEs*                                                               | 2 (2.1)                                  | 2 (2.2)                                  | 2 (4.7)                                                | 2 (4.3)                                                | 4 (2.1)                                            | 5 (2.6)                                            | 8 (2.9)                                                |
| ≥Grade 3 TEAE†                                                                   | 9 (9.4)                                  | 16 (17.2)                                | 2 (4.7)                                                | 12 (25.5)                                              | 25 (13.2)                                          | 23 (12.0)                                          | 39 (14.0)                                              |
| TEAEs leading to permanent<br>discontinuation of study drug<br>or reference drug |                                          |                                          |                                                        |                                                        |                                                    |                                                    |                                                        |
| All                                                                              | 7 (7.3)                                  | 3 (3.2)                                  | 2 (4.7)                                                | 4 (8.5)                                                | 10 (5.3)                                           | 8 (4.2)                                            | 16 (5.7)                                               |
| Drug-related*                                                                    | 3 (3.1)                                  | 2 (2.2)                                  | 2 (4.7)                                                | 4 (8.5)                                                | 5 (2.6)                                            | 6 (3.1)                                            | 11 (3.9)                                               |
| SAEs                                                                             | 4 (4.2)                                  | 0                                        | 1 (2.3)                                                | 2 (4.3)                                                | 4 (2.1)                                            | 3 (1.6)                                            | 7 (2.5)                                                |
| Drug-related SAEs*                                                               | 2 (2.1)                                  | 0                                        | 1 (2.3)                                                | 2 (4.3)                                                | 2 (1.1)                                            | 2 (1.0)                                            | 5 (1.8)                                                |

Treatment-emergent adverse events are defined as any adverse event that started or worsened in severity after initial dose of study drug or reference drug through the follow-up period. In this table, treatment-emergent adverse events from first dose after Week 12 visit through the follow-up period is applicable. All values are n (%). SAE, serious adverse event; SAF, safety analysis set; TEAE, treatment-emergent adverse event.

\*Possible or probable, as assessed by the investigator or records where relationship is missing.

†Based on National Cancer Institute Common Terminology Criteria for Adverse Events grading: grade 3 = severe or medically significant, grade 4 = life threatening, grade 5 = death related to AE.

## SUPPLEMENTARY FIGURES

## Supplementary Figure 1. Study design

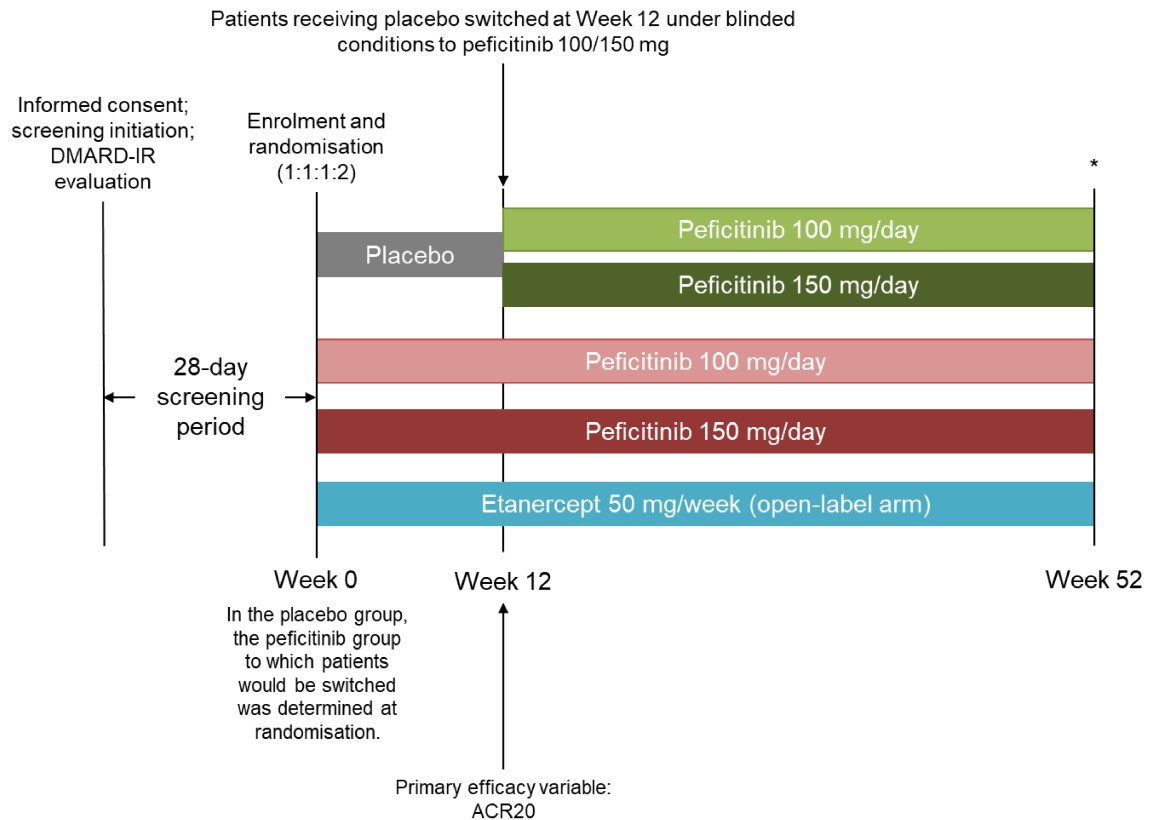

IR, inadequate response

\*Patients completing the study enrolled into an open-label extension study except for those in the etanercept group. Patients in the etanercept group or those who did not proceed to the extension study underwent follow-up observation 4 weeks after the end of the study treatment.

**Supplementary Figure 2.** Proportion of patients achieving DAS28-ESR <2.6, DAS28-CRP <2.6, and DAS28-CRP  $\leq$ 3.2 at Week 12/ET and Week 52/ET (FAS)

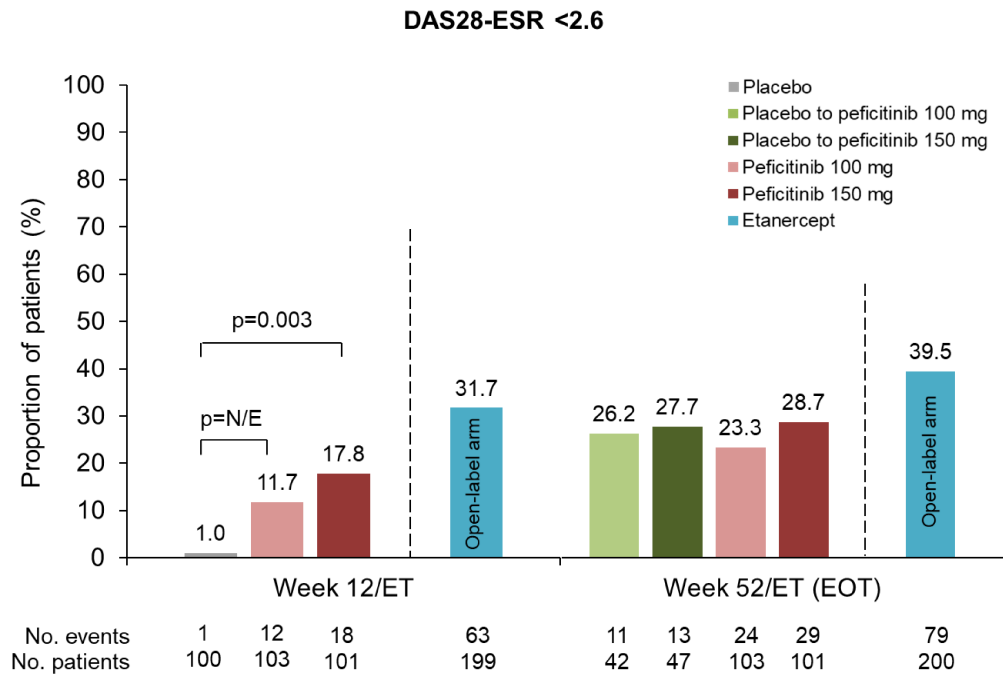

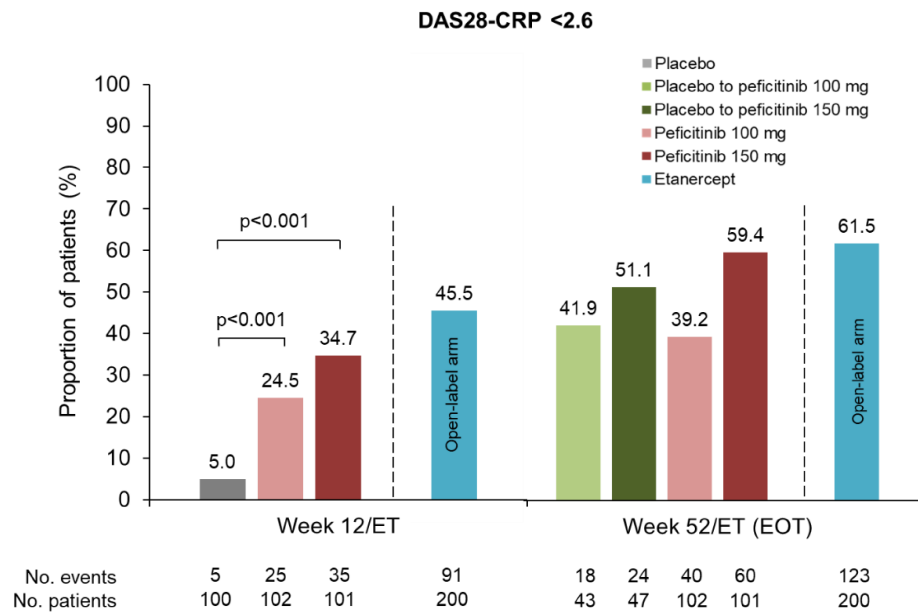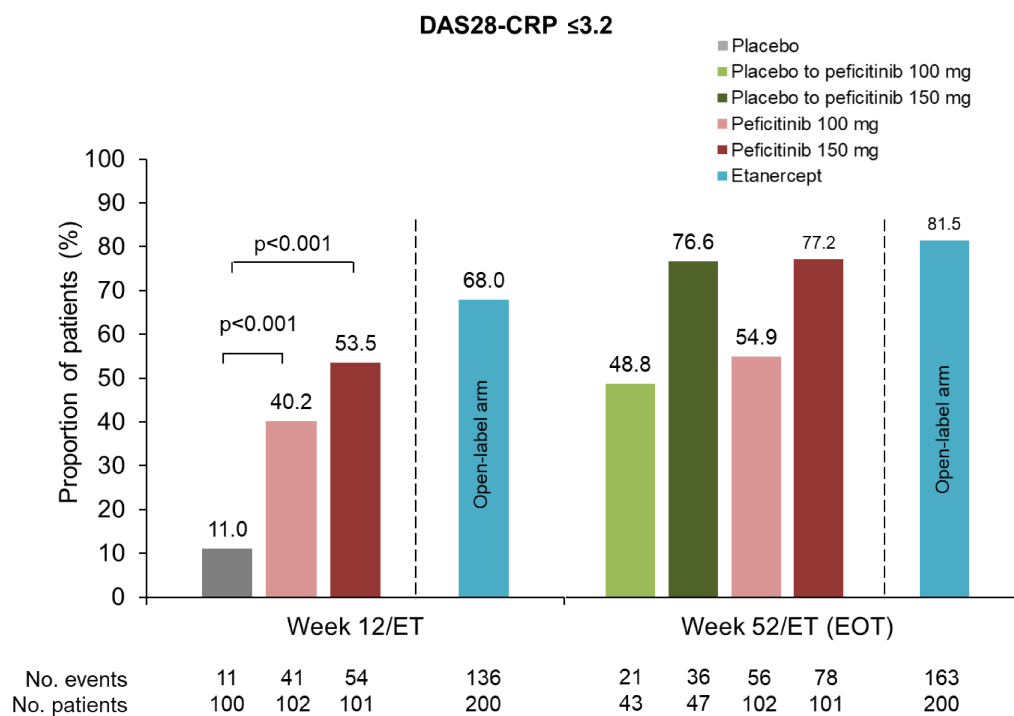

[Footnote for all parts of Supplementary Figure 2]

CRP, C-reactive protein; DAS, disease activity score; ESR, erythrocyte sedimentation rate; EOT, end of treatment; ET, early termination; N/E, not estimable. The percentage of patients with DAS28-CRP $\leq$ 3.2 was not calculated for placebo/peficitinib 100 mg and placebo/peficitinib 150 mg. In the case of early termination, DAS components were analysed using the last observation carried forward method prior to calculation of DAS responses. P values were calculated using Wald's Chi-square test with no multiplicity adjustment. Statistical comparisons were not conducted for Week 52/ET data. Etanercept was an open-label reference group and was not included in statistical comparisons with placebo.

**Supplementary Figure 3.** ACR20, ACR50 and ACR70 response rates from baseline to Week 12 and Week 12/ET

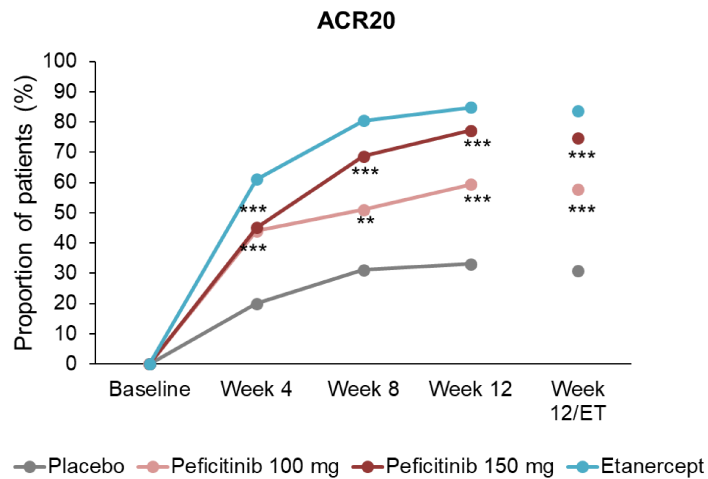

**No. with response, n/N**

|                    |         |         |         |         |
|--------------------|---------|---------|---------|---------|
| Placebo            | 19/95   | 28/90   | 29/88   | 31/101  |
| Peficitinib 100 mg | 43/98   | 49/96   | 57/96   | 60/104  |
| Peficitinib 150 mg | 45/100  | 68/99   | 71/92   | 76/102  |
| Etanercept         | 122/200 | 157/195 | 162/191 | 167/200 |

**Proportion of patients, %**

|                    |      |      |      |      |
|--------------------|------|------|------|------|
| Placebo            | 20.0 | 31.1 | 33.0 | 30.7 |
| Peficitinib 100 mg | 43.9 | 51.0 | 59.4 | 57.7 |
| Peficitinib 150 mg | 45.0 | 68.7 | 77.2 | 74.5 |
| Etanercept         | 61.0 | 80.5 | 84.8 | 83.5 |

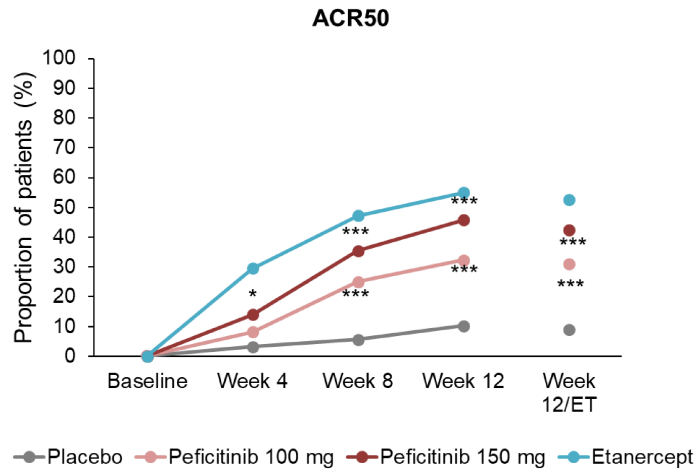

| No. with response, n/N | Week 4 | Week 8 | Week 12 | Week 12/ET |
|------------------------|--------|--------|---------|------------|
| Placebo                | 3/95   | 5/90   | 9/88    | 9/101      |
| Peficitinib 100 mg     | 8/98   | 24/96  | 31/96   | 32/104     |
| Peficitinib 150 mg     | 14/100 | 35/99  | 42/92   | 43/102     |
| Etanercept             | 59/200 | 92/195 | 105/191 | 105/200    |

| Proportion of patients, % | Week 4 | Week 8 | Week 12 | Week 12/ET |
|---------------------------|--------|--------|---------|------------|
| Placebo                   | 3.2    | 5.6    | 10.2    | 8.9        |
| Peficitinib 100 mg        | 8.2    | 25.0   | 32.3    | 30.8       |
| Peficitinib 150 mg        | 14.0   | 35.4   | 45.7    | 42.2       |
| Etanercept                | 29.5   | 47.2   | 55.0    | 52.5       |

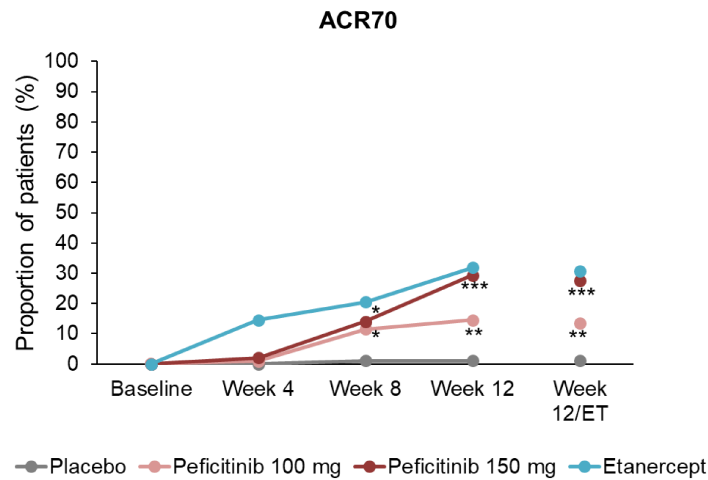**No. with response, n/N**

|                    |        |        |        |        |
|--------------------|--------|--------|--------|--------|
| Placebo            | 0/95   | 1/90   | 1/88   | 1/101  |
| Peficitinib 100 mg | 1/98   | 11/96  | 14/96  | 14/104 |
| Peficitinib 150 mg | 2/100  | 14/99  | 27/92  | 28/102 |
| Etanercept         | 29/200 | 40/195 | 61/191 | 61/200 |

**Proportion of patients, %**

|                    |      |      |      |      |
|--------------------|------|------|------|------|
| Placebo            | 0.0  | 1.1  | 1.1  | 1.0  |
| Peficitinib 100 mg | 1.0  | 11.5 | 14.6 | 13.5 |
| Peficitinib 150 mg | 2.0  | 14.1 | 29.3 | 27.5 |
| Etanercept         | 14.5 | 20.5 | 31.9 | 30.5 |

[Footnote for all parts of Supplementary Figure 3]

ET, early termination. For ACR50 and ACR70, results of ad-hoc analysis using a logistic regression model, "ACR50 or ACR70 response (responder, non-responder) = treatment", are shown. For all timepoints except for Week 12/ET and EOT, observed data are plotted. For Week 12/ET and EOT, in the case of early termination, ACR components were analysed using the last observation carried forward method (LOCF) first, and then ACR20/50/70 responses were calculated. P values for ACR70 differences from placebo were not estimable for peficitinib 100 mg and 150 mg at Week 4. P values were calculated using Wald's Chi-square test with no multiplicity adjustment, except for ACR20 response rates at Week 12/ET for which a closed testing procedure was used for multiplicity adjustment. Etanercept was an open-label reference group and was not included in statistical comparisons with placebo.

\*p<0.05; \*\*p<0.01; \*\*\*p<0.001



**Supplementary Figure 4.** Rates of remission and low disease activity at Week 12/ET and Week 52/ET (EOT): proportion of patients with **(A)** CDAI score  $\leq 2.8$ ; **(B)** CDAI score  $\leq 10$  (low disease activity); **(C)** SDAI score  $\leq 3.3$  and **(D)** SDAI score  $\leq 11$  (low disease activity)

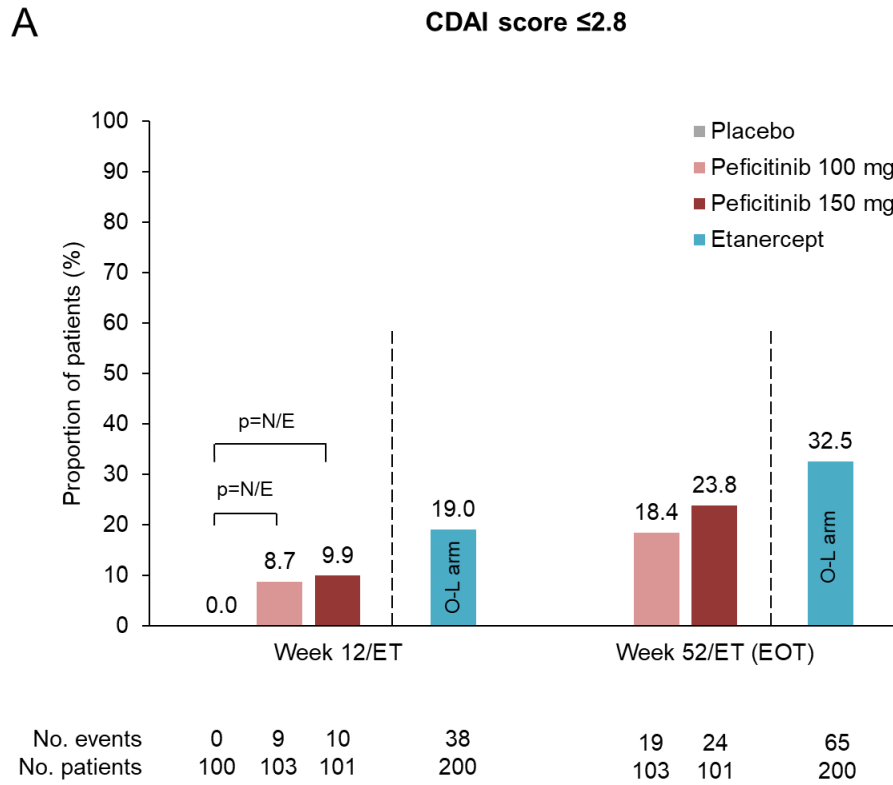

**B**

**CDAI score  $\leq 10$**

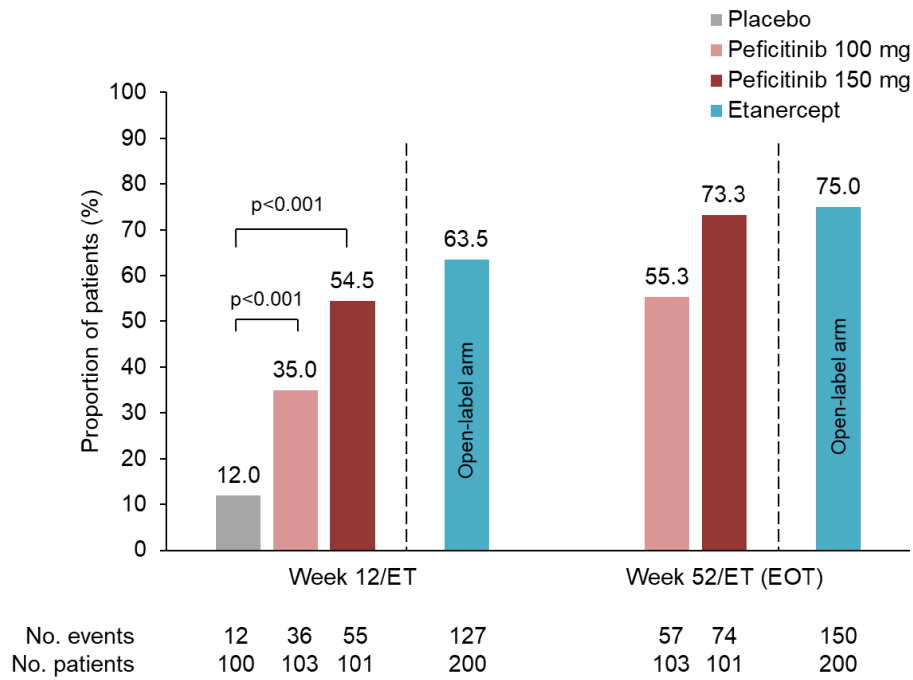

**C**

**SDAI score  $\leq 3.3$**

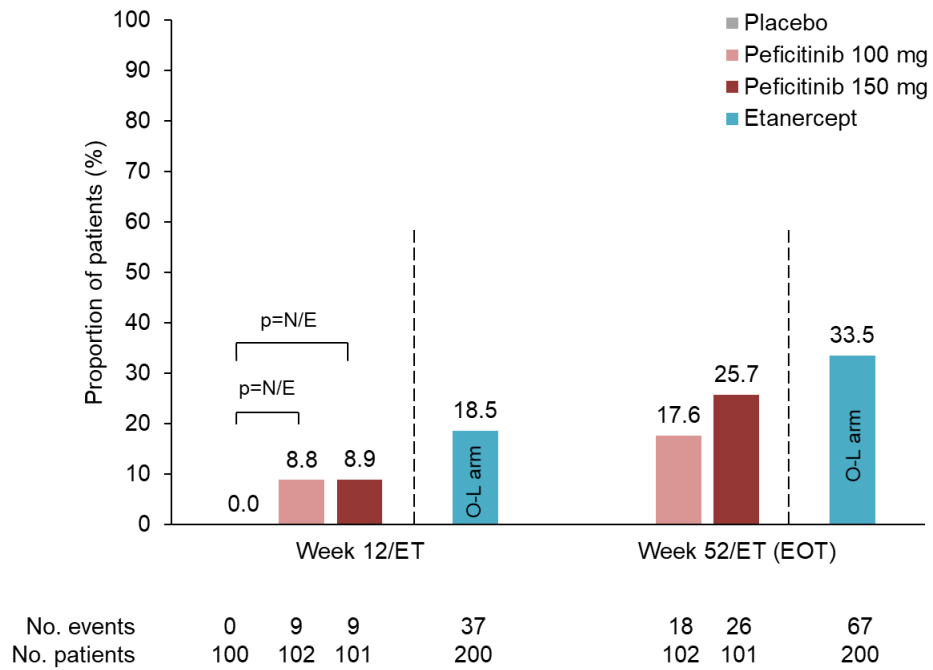

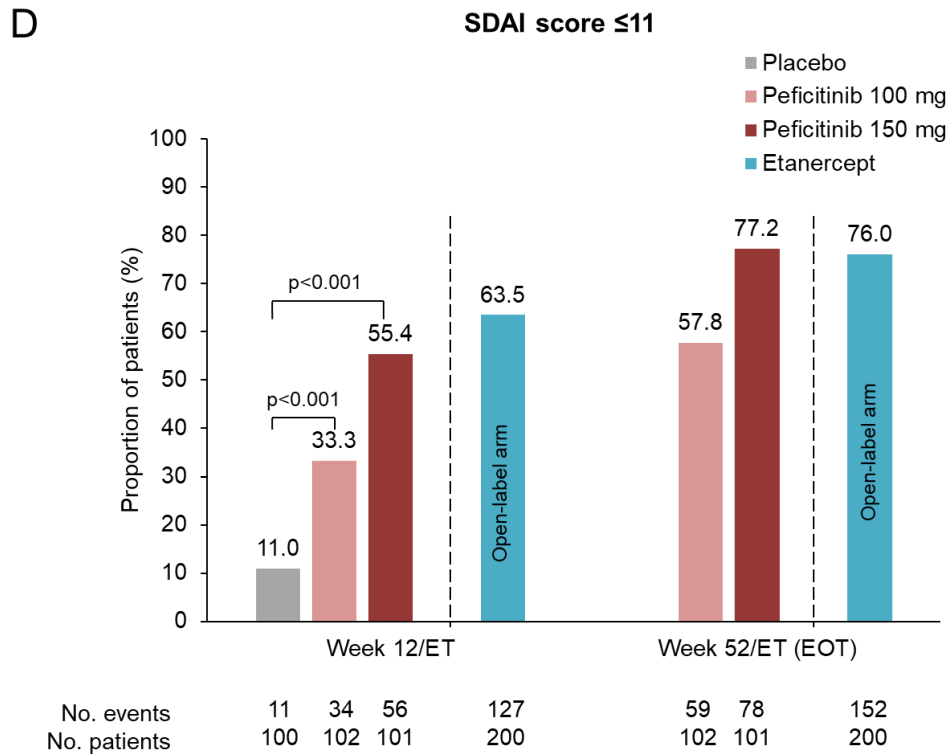

[Footnote for all parts of Supplementary Figure 4]

EOT, end of treatment; ET, early termination; N/E, not estimable. In the case of early termination, CDAI/SDAI components were analysed using the last observation carried forward method (LOCF) first, and then CDAI/SDAI scores were calculated. P values were calculated using Wald's Chi-square test with no multiplicity adjustment. Etanercept was an open-label reference arm and was not included in statistical comparisons with placebo.

**Supplementary Figure 5.** Changes from baseline to Week 12/ET in **(A)** CDAI and **(B)** SDAI

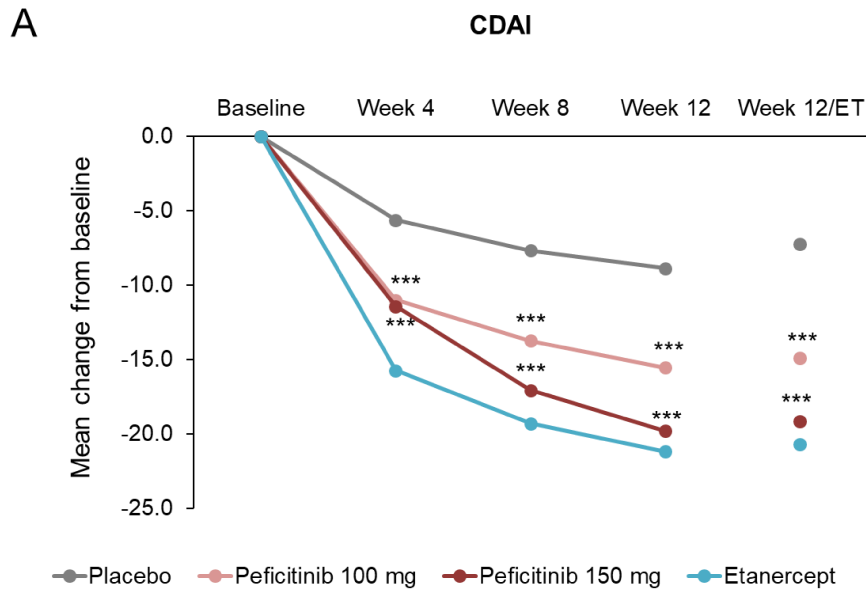

|                        | Baseline | Week 4 | Week 8 | Week 12 | Week 12/ET |
|------------------------|----------|--------|--------|---------|------------|
| <b>No. of patients</b> |          |        |        |         |            |
| Placebo                | 100      | 95     | 90     | 88      | 99         |
| Peficitinib 100 mg     | 103      | 98     | 96     | 96      | 102        |
| Peficitinib 150 mg     | 102      | 100    | 99     | 92      | 101        |
| Etanercept             | 200      | 200    | 195    | 191     | 200        |
| <b>Mean change</b>     |          |        |        |         |            |
| Placebo                |          | -5.62  | -7.67  | -8.87   | -7.25      |
| Peficitinib 100 mg     |          | -11.01 | -13.74 | -15.55  | -14.91     |
| Peficitinib 150 mg     |          | -11.42 | -17.06 | -19.81  | -19.20     |
| Etanercept             |          | -15.73 | -19.31 | -21.21  | -20.74     |

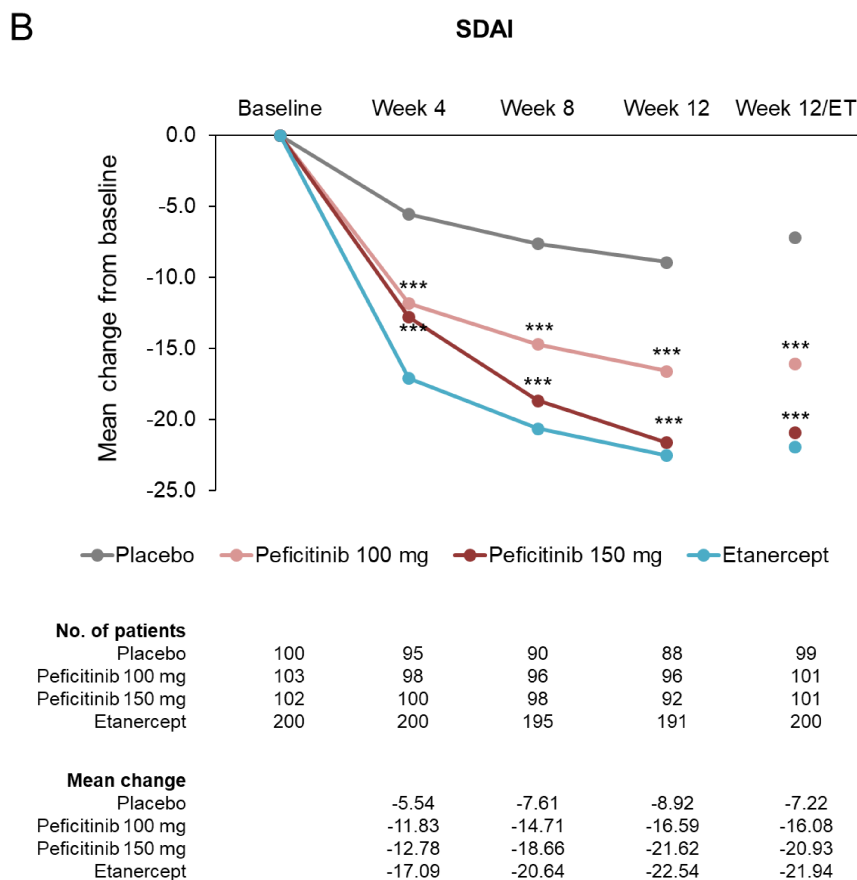

[Footnote for both parts of Supplementary Figure 5]

CDAI, clinical disease activity index; ET, early termination; SDAI, simplified disease activity index. For all timepoints except for Week 12/ET, observed data are plotted. For Week 12/ET, in the case of early termination, CDAI/SDAI components were analysed using the last observation carried forward method (LOCF) first, and then CDAI/SDAI were calculated. Data are plotted as mean. P values were calculated with no multiplicity adjustment. Etanercept was an open-label reference arm and was not included in statistical comparisons with placebo.

\* $p < 0.05$ ; \*\* $p < 0.01$ ; \*\*\* $p < 0.001$

**LIST OF STUDY SITES****Japan**

Medical Corporation Association Osaki Internal Clinic

Medical Corporation Association Sagawa Akira Rheumatology Clinic

Sapporo City General Hospital

General Incorporated Foundation Hikarigaoka-Aiseikai Hikarigaoka Spellman Hospital

Medical Corporation Heizenkai Ohno Clinic

Medical Corporation Association Kojokai, Hirose Clinic

Honjo Rheumatism Clinic

Medical Corporation Kojunikai Osaka Rehabilitation Hospital

Hiroshima Red Cross Hospital & Atomic-bomb Survivors Hospital

Medical Corporation Hiroshima Rheumatology Clinic

Medical Corporation SORR Shigenobu Orthopedic Rheumatism and Rehabilitation Clinic

Medical Corporation Association Aiaikai Ishioka Clinic

Medical Corporation Koyukai Oribe Rheumachika Naika Clinic

Shono Rheumatism Clinic

National Hospital Organization Kyushu Medical Center

Social Medical Corporation Association Kumamoto-Marutakai Kumamoto Orthopaedic Hospital

Medical Corporation Jiyukai Yu-Family Clinic

National University Corporation Tokyo Medical And Dental University Medical Hospital

Nagaoka Red Cross Hospital

Medical Corporation Association Katayama Seikeigeka Rheumatism Clinic

Medical Corporation Izumiyamakai East Sendai Rheumatism and Internal Medicine Clinic

National University Corporation Hokkaido University Hospital

Institute of Rheumatology, Tokyo Women's Medical University

Medical Corporation Inoue Hospital

Medical Corporation Koseikai Kuroda Orthopedic Hospital

Medical Corporation Association Aoikai Sendai Taihaku Hospital

Nagoya University Hospital

Medical Corporation Seijinkai Hokkaido Medical Center for Rheumatic Diseases  
Hospital of the University of Occupational and Environmental Health, Japan  
Matsubara Mayflower Hospital  
Medical Corporation Association Matsubara Clinic  
National University Corporation The University of Tokyo Hospital  
Kumamoto Rheumatology Clinic  
Medical Corporation Daimyokai Miyasato Clinic  
Kawasaki Municipal Hospital  
Komagamine Rheumatoid Orthopaedic Clinic  
Medical Corporation Association Koshinkai Ohira Orthopaedic Hospital  
Osafune Clinic  
Medical Corporation Rheumatology Kenkeikai Azuma Rheumatology Clinic  
Sugimoto Clinic  
Social Welfare Organization Saiseikai Imperial Gift Foundation, Inc. Mito Saiseikai General Hospital  
Medical Corporation Seiwakai Hiroshima Clinic  
Specific Medical Corporation Seijinkai Okubo Hospital  
Medical Corporation Kakuseikai Tsurukami Orthopedic Rheumatism Clinic  
Medical Corporation Association Kawasaki Rheumatism & Internal Medicine Clinic  
National Hospital Organization Kyushu Medical Center  
Ogawa Internal Medicine Clinic  
National Hospital Organization Toneyama National Hospital  
Medical Corporation Ishinkai Kaneko Internal and Rheumatoid Clinic  
Medical Corporation Association Seisenkai Fujimori Clinic  
National Hospital Organization Beppu Medical Center  
Medical Corporation Seiryukai Eiraku Clinic  
Suzuki Clinic  
National Hospital Organization Fukuoka Hospital  
Aichi Koseiren Kainan Hospital  
National Hospital Organization Himeji Medical Center  
Social Welfare Organization Saiseikai Imperial Gift Foundation, Inc. Osaka Saiseikai Suita Hospital

Social Medical Corporation Yukinoseibokai St. Mary's Hospital  
National Hospital Organization Tokyo Medical Center  
Japanese Red Cross Koga Hospital  
Japanese Red Cross Kagoshima Hospital  
National Hospital Organization Ureshino Medical Center  
Kyushu Central Hospital of the Mutual Aid Association of Public School Teachers  
Kamituga Koseiren Kamituga General Hospital  
National Hospital Organization Osaka Minami Medical Center  
Local Incorporated Administrative Agency Nagano Municipal Hospital  
Saitama Medical University Hospital  
Toho University Ohashi Medical Center  
Tokai University Hospital  
University Hospital Kyoto Prefectural University of Medicine  
National University Corporation Osaka University Hospital  
Okayama University Hospital  
Kagawa University Hospital  
Medical Corporation Association R&O Shizuoka Rheumatism Orthopedic Rehabilitation Hospital  
Social Welfare Corporation Hakodate Koseiin Hakodate Goryokaku Hospital  
Soshigaya Okura Clinic  
National University Corporation Kobe University Hospital  
Medical Corporation Ryokufukai Misato Marine Hospital  
Medical Corporation Hinouekai Higami Hospital  
Social Welfare Corporation Mitsui Memorial Hospital  
Yokohama City Minato Red Cross Hospital  
Medical Corporation Hidaka Orthopedic Hospital  
Medical Corporation Gotokai Nagasaki Medical Hospital of Rheumatology  
Public interest incorporated foundation Sasaki Institute Kyoundo Hospital  
Medical Corporation Association Hoyokai Matsuta Internal Clinic  
National Hospital Organization Nagasaki Medical Center  
Social Medical Corporation Association Kinoshitakai Kamagaya General Hospital



Miyashita Rheumatology Clinic  
Medical Corporation Tokito Clinic Rheumatology & Orthopaedic Surgery  
Medical Corporation Soshikai Munakata Yasuhiko Clinic  
Medical Corporation Inokuchi Clinic  
Medical Corporation Shureikai Oasis Clinic  
National Hospital Organization Toyohashi Medical Center  
National Hospital Organization Nagoya Medical Center  
Medical Corporation Tokushukai Fukuoka Tokushukai Medical Center  
Japanese Red Cross Nagasaki Genbaku Hospital  
General Incorporated Foundation Konankai Konan Kakogawa Hospital  
Federation of National Public Service Personnel Mutual Aid Associations Tonan Hospital  
Social Welfare Corporation Saiseikai Imperial Gift Foundation, Inc. Chibaken Saiseikai Narashino Hospital  
Hyogo College of Medicine Hospital  
Japanese Red Cross Okayama Hospital  
Federation of National Public Service Personnel Mutual Aid Associations Shinkokura Hospital  
Aso Iizuka Hospital  
Social Medical Corporation Zenjinkai Shiminnomori Hospital  
Japanese Red Cross Kyoto Daiichi Hospital  
Kushiro Red Cross Hospital  
Social Medical Corporation Sokokai Gyoda General Hospital Gyoda Clinic  
Matsudo City General Hospital  
Social Welfare Corporation St. Teresa's Society St. Joseph's Hospital  
Independent Administrative Agency Japan Organization of Occupational Health and Safety Chubu Rosai Hospital  
Federation of National Public Service Personnel Mutual Aid Associations Hamanomachi Hospital  
Kakegawa City and Fukuroi Hospital Companies Orchestra Middle East Far-General Medical Center  
Local Incorporated Administrative Agency Higashiosaka City Medical Center  
Japanese Red Cross Shizuoka Hospital  
Japan Mutual Aid Association of Public School Teachers Kinki Central Hospital  
Kindai University Sakai Hospital

National Hospital Organization Shimoshizu Hospital  
National University Corporation Toyama University Hospital  
Fujita Health University Hospital  
National Hospital Organization Sagami National Hospital  
Incorporated Educational Institution, St. Luke's International University, St. Luke's International Hospital  
National University Corporation The University of Tokyo Hospital  
Niigata Rheumatic Center  
Jichi Medical University Hospital  
National University Corporation Osaka University Hospital  
Nagasaki University Hospital  
Toho University Omori Medical Center  
Juntendo University Hospital  
Osaka City University Hospital  
National University Corporation Tohoku University Hospital  
Nippon Medical School Hospital  
Social Medical Corporation Foundation Hakujuikai Sasebo Chuo Hospital  
National University Corporation Kobe University Hospital  
Shirahama Foundation for Health and Welfare Shirahama Hamayu Hospital  
JA Aichi Koseiren Toyota Kosei Hospital  
Osaka Rheumatology Clinic  
NTT-East Sapporo Hospital  
Kyoto University Hospital  
Saitama Medical Center  
Independent Administrative Agency Japan Community Health care Organization Isahaya General Hospital  
Medical Corporation Association Yamanakai Higashi-Hiroshima Memorial Hospital  
Kyushu University Hospital

**Korea**

Seoul National University Hospital  
Hanyang University Seoul Hospital

Severance Hospital

Daegu Catholic University Medical Center

Chonnam National University Hospital

Inha University Hospital

Ajou University Hospital

Chonbuk National University Hospital

KonKuk University Hospital

Keimyung University Dongsan Medical Center

KyungHee University Hospital

### **Taiwan**

National Taiwan University Hospital

Taipei Veteran General Hospital

Chang Gung Memorial Hospital-LinKou

Taichung Veterans General Hospital

China Medical University Hospital

Dalin Branch of Buddhist Tzu Chi General Hospital

Chang Gung Memorial Hospital-Kaohsiung

Kaohsiung Medical University Chung-Ho Memorial Hospital

Kaohsiung Veterans General Hospital

Chung Shan Medical University Hospital

Cathay General Hospital

National Cheng Kung University Hospital
